# Supplementary material for: Candidate Plasma Biomarkers to Detect Anthracycline‐Related Cardiomyopathy in Childhood Cancer Survivors: A Case Control Study in the Dutch Childhood Cancer Survivor Study
Source: PubMed Central journal article supplement — J Am Heart Assoc. 2022 Jul 13;11(14):e025935. doi: 10.1161/JAHA.121.025935 (PMC9707839; doi:10.1161/jaha.121.025935), 2022-07-13
Supplement: JAH3-11-e025935-s001.pdf [file JAH3-11-e025935-s001.pdf]

# **SUPPLEMENTAL MATERIAL**

**Table S1. Patient characteristics of ACMP cases without heart failure and matched controls.**

| <b>Characteristic</b>                              | <b>Controls (n=21)</b>  | <b>ACMP cases (n=20)</b> |
|----------------------------------------------------|-------------------------|--------------------------|
| Male sex                                           | 8 (38.1)                | 11 (55.0)                |
| Age at cancer diagnosis                            | 7.39 [5.32, 10.40]      | 8.54 [3.10, 12.83]       |
| Age at blood sampling                              | 39.52 [32.81, 46.97]    | 34.48 [30.00, 43.41]     |
| Time since cancer diagnosis                        | 28.09 [22.22, 33.21]    | 21.44 [16.21, 27.06]     |
| Anthracyclines                                     | 19 (90.5)               | 15 (75.0)                |
| Anthracyclines cumulative dose*, mg/m <sup>2</sup> | 288.60 [186.00, 400.00] | 234.00 [72.00, 472.50]   |
| Mitoxantrone                                       | 7 (33.3)                | 7 (35.0)                 |
| Mitoxantrone dose, mg/m <sup>2</sup>               | 50.00 [40.00, 102.00]   | 120.00 [50.00, 121.00]   |
| Chest RT                                           | 2 (9.5)                 | 1 (5.0)                  |
| Chest RT cumulative dose, Gray                     | 20.00 [20.00, 20.00]    | 50.00 [50.00, 50.00]     |
| Cardiac medication(s)                              | 2 (9.5)                 | 8 (40.0)                 |
| Hypercholesterolemia                               | 1 (4.8)                 | 1 (5.0)                  |
| Diabetes                                           | 0 (0.0)                 | 0 (0.0)                  |
| Hypertension                                       | 0 (0.0)                 | 1 (5.0)                  |
| Systolic blood pressure, mmHg                      | 124.86 (15.92)          | 121.95 (21.07)           |
| Diastolic blood pressure, mmHg                     | 77.95 (10.26)           | 75.85 (16.85)            |
| Heart rate, bpm                                    | 69.66 (14.93)           | 74.54 (12.31)            |
| BMI, kg/m <sup>2</sup>                             | 26.36 (4.59)            | 25.59 (5.24)             |
| Biplane LVEF, %                                    | 57.66 (2.42)            | 41.28 (3.28)             |
| LVIDd, cm                                          | 4.59 (0.61)             | 5.11 (0.68)              |

Categorical values are presented as number (%). Continuous values are presented as mean  $\pm$  standard deviation (sd) or as median [inter-quartile range]. \*Doxorubicin equivalents (Daunorubicin\*0.6 + epirubicin\*0.8 + idarubicin\*3). BMI=Body mass index, LVEF=left ventricular ejection fraction, LVIDd=left ventricular end diastolic diameter, chest RT=chest-directed radiotherapy.

**Table S2. Results of the multivariable linear regression analyses comparing plasma levels of 221 proteins between anthracycline-related cardiomyopathy (ACMP) cases and anthracycline-treated controls and between ACMP cases and dilated cardiomyopathy patients (DCM). Models were adjusted for sex, time since cancer diagnosis, anthracycline and chest-directed radiotherapy dose.**

| Protein   | Uniprot ID | ACMP - controls |         |         |                         | ACMP - DCM  |         |         |
|-----------|------------|-----------------|---------|---------|-------------------------|-------------|---------|---------|
|           |            | Fold change     | p-value | q-value | Selected by elastic net | Fold change | p-value | q-value |
| NT-proBNP | NA         | 2.429           | 0.001   | 0.036   | Forced                  | 1.711       | 0.054   | 0.125   |
| CCL19     | Q99731     | 1.550           | 0.001   | 0.036   | Yes                     | 1.254       | 0.140   | 0.239   |
| PTN       | P21246     | 1.543           | 0.001   | 0.036   | No                      | 1.345       | 0.079   | 0.159   |
| PSP-D     | P35247     | 1.637           | 0.001   | 0.036   | Yes                     | 1.345       | 0.060   | 0.130   |
| CCL20     | P78556     | 1.995           | 0.003   | 0.086   | Yes                     | 1.562       | 0.105   | 0.195   |
| JAM-A     | Q9Y624     | 1.466           | 0.006   | 0.139   | No                      | 1.290       | 0.162   | 0.260   |
| CCL16     | O15467     | 1.448           | 0.008   | 0.144   | Yes                     | 1.427       | 0.014   | 0.057   |
| CD40      | P25942     | 1.270           | 0.009   | 0.144   | No                      | 1.121       | 0.326   | 0.433   |
| CCL25     | O15444     | 1.393           | 0.009   | 0.144   | Yes                     | 1.666       | 0.001   | 0.013   |
| CXCL10    | P02778     | 1.479           | 0.010   | 0.144   | No                      | 1.182       | 0.386   | 0.481   |
| RARRES2   | Q99969     | 1.222           | 0.011   | 0.144   | Yes                     | 1.376       | 0.000   | 0.005   |
| CXCL9     | Q07325     | 1.613           | 0.012   | 0.146   | No                      | 1.336       | 0.152   | 0.252   |
| IL-6RA    | P08887     | 1.225           | 0.015   | 0.168   | Yes                     | 1.190       | 0.045   | 0.112   |
| FGF-21    | Q9NSA1     | 2.173           | 0.016   | 0.168   | Yes                     | 3.666       | 0.001   | 0.017   |
| SELP      | P16109     | 1.301           | 0.018   | 0.169   | Yes                     | 1.352       | 0.024   | 0.074   |
| CXCL11    | O14625     | 1.383           | 0.018   | 0.169   | No                      | 1.230       | 0.213   | 0.313   |
| GDF-15    | Q99988     | 1.415           | 0.020   | 0.169   | No                      | 1.254       | 0.193   | 0.297   |
| VEGFA     | P15692     | 1.233           | 0.021   | 0.169   | No                      | 1.188       | 0.071   | 0.150   |
| NUCB2     | P80303     | 1.270           | 0.026   | 0.189   | No                      | 1.411       | 0.004   | 0.024   |
| CHIT1     | Q13231     | 1.689           | 0.027   | 0.189   | No                      | 1.329       | 0.114   | 0.205   |
| CXCL6     | P80162     | 1.282           | 0.030   | 0.189   | No                      | 1.247       | 0.074   | 0.155   |
| CA14      | Q9ULX7     | 0.805           | 0.030   | 0.189   | Yes                     | 1.528       | 0.000   | 0.002   |
| IL-17A    | Q16552     | 1.303           | 0.031   | 0.189   | Yes                     | 0.979       | 0.894   | 0.911   |
| ENTPD2    | Q9Y5L3     | 1.207           | 0.032   | 0.189   | No                      | 1.127       | 0.166   | 0.261   |
| TNFRSF9   | Q07011     | 1.296           | 0.033   | 0.189   | No                      | 1.428       | 0.007   | 0.038   |
| PON2      | Q15165     | 1.179           | 0.036   | 0.189   | Yes                     | 1.273       | 0.013   | 0.057   |
| SIRT2     | Q8IXJ6     | 1.664           | 0.037   | 0.189   | Yes                     | 1.307       | 0.325   | 0.433   |
| NOS3      | P29474     | 1.227           | 0.038   | 0.189   | Yes                     | 0.974       | 0.840   | 0.876   |
| STX8      | Q9UNK0     | 1.293           | 0.038   | 0.189   | No                      | 1.137       | 0.382   | 0.481   |
| AIFM1     | O95831     | 1.584           | 0.039   | 0.189   | Yes                     | 1.154       | 0.584   | 0.672   |
| CSTB      | P04080     | 1.370           | 0.040   | 0.189   | No                      | 1.284       | 0.120   | 0.211   |
| PON3      | Q15166     | 0.754           | 0.041   | 0.189   | No                      | 1.165       | 0.250   | 0.360   |
| IL8       | P10145     | 1.275           | 0.046   | 0.189   | No                      | 1.285       | 0.060   | 0.130   |
| MCP-1     | P13500     | 1.202           | 0.049   | 0.189   | No                      | 1.330       | 0.005   | 0.027   |
| t-PA      | P00750     | 1.240           | 0.051   | 0.189   | No                      | 1.547       | 0.001   | 0.015   |
| FABP4     | P15090     | 1.517           | 0.051   | 0.189   | No                      | 1.194       | 0.415   | 0.503   |
| MMP-1     | P03956     | 1.414           | 0.052   | 0.189   | Yes                     | 1.223       | 0.351   | 0.453   |
| CPB1      | P15086     | 1.310           | 0.053   | 0.189   | No                      | 1.037       | 0.825   | 0.864   |

|                |        |       |       |       |     |       |       |       |
|----------------|--------|-------|-------|-------|-----|-------|-------|-------|
| SERPINA9       | Q86WD7 | 1.289 | 0.053 | 0.189 | Yes | 1.205 | 0.329 | 0.435 |
| CTSD           | P07339 | 1.188 | 0.053 | 0.189 | Yes | 1.345 | 0.003 | 0.021 |
| IL-12B         | P29460 | 1.274 | 0.054 | 0.189 | No  | 1.027 | 0.869 | 0.897 |
| EPO            | P01588 | 1.413 | 0.055 | 0.189 | Yes | 1.176 | 0.437 | 0.516 |
| CCL24          | O00175 | 0.721 | 0.058 | 0.189 | No  | 1.122 | 0.603 | 0.690 |
| HGF            | P14210 | 1.197 | 0.059 | 0.189 | No  | 1.400 | 0.002 | 0.021 |
| IGFBP-7        | Q16270 | 1.242 | 0.059 | 0.189 | No  | 1.560 | 0.001 | 0.017 |
| IL6            | P05231 | 1.583 | 0.062 | 0.189 | No  | 1.555 | 0.091 | 0.174 |
| MEPE           | Q9NQ76 | 1.241 | 0.063 | 0.189 | Yes | 1.355 | 0.019 | 0.065 |
| NT-3           | P20783 | 1.226 | 0.064 | 0.189 | No  | 1.145 | 0.246 | 0.357 |
| 4E-BP1         | Q13541 | 1.724 | 0.065 | 0.189 | No  | 1.088 | 0.799 | 0.841 |
| vWF            | P04275 | 1.385 | 0.066 | 0.189 | No  | 1.385 | 0.047 | 0.112 |
| CASP-3         | P42574 | 1.467 | 0.067 | 0.189 | Yes | 1.261 | 0.343 | 0.445 |
| STAMBP         | O95630 | 1.411 | 0.067 | 0.189 | No  | 1.262 | 0.258 | 0.368 |
| YES1           | P07947 | 1.457 | 0.068 | 0.189 | No  | 0.899 | 0.652 | 0.717 |
| CDCP1          | Q9H5V8 | 1.205 | 0.081 | 0.220 | No  | 1.602 | 0.000 | 0.005 |
| LRP1           | Q07954 | 1.140 | 0.082 | 0.220 | Yes | 1.224 | 0.021 | 0.068 |
| TNF            | P01375 | 1.167 | 0.084 | 0.220 | No  | 1.143 | 0.163 | 0.260 |
| MVK            | Q03426 | 1.313 | 0.085 | 0.220 | Yes | 1.087 | 0.633 | 0.709 |
| Flt3L          | P49771 | 1.136 | 0.087 | 0.221 | Yes | 1.275 | 0.014 | 0.057 |
| BAMBI          | Q13145 | 1.203 | 0.094 | 0.228 | No  | 1.258 | 0.114 | 0.205 |
| MAP4K5         | Q9Y4K4 | 1.469 | 0.095 | 0.228 | No  | 0.894 | 0.650 | 0.717 |
| U-PAR          | Q03405 | 1.170 | 0.099 | 0.228 | No  | 1.338 | 0.004 | 0.026 |
| GP6            | Q9HCN6 | 1.161 | 0.102 | 0.228 | No  | 1.105 | 0.372 | 0.471 |
| MAEA           | Q7L5Y9 | 1.199 | 0.103 | 0.228 | No  | 1.093 | 0.636 | 0.709 |
| MCP-1          | P13500 | 1.159 | 0.103 | 0.228 | No  | 1.310 | 0.006 | 0.032 |
| ST1A1          | P50225 | 1.340 | 0.105 | 0.228 | Yes | 1.188 | 0.430 | 0.514 |
| PTPRJ          | Q12913 | 1.309 | 0.105 | 0.228 | No  | 1.375 | 0.075 | 0.156 |
| DNER           | Q8NFT8 | 0.906 | 0.106 | 0.228 | No  | 1.132 | 0.106 | 0.195 |
| uPA            | P00749 | 1.131 | 0.106 | 0.228 | No  | 1.358 | 0.000 | 0.005 |
| TRANCE         | O14788 | 1.259 | 0.107 | 0.228 | Yes | 1.238 | 0.146 | 0.248 |
| PAI            | P05121 | 1.326 | 0.115 | 0.238 | No  | 1.794 | 0.003 | 0.021 |
| PECAM-1        | P16284 | 1.154 | 0.118 | 0.238 | No  | 1.227 | 0.064 | 0.137 |
| SCGB3A2        | Q96PL1 | 1.329 | 0.123 | 0.238 | No  | 1.291 | 0.195 | 0.298 |
| LAP TGF-beta-1 | P01137 | 1.135 | 0.124 | 0.238 | No  | 1.351 | 0.002 | 0.018 |
| IL2-RA         | P01589 | 1.183 | 0.125 | 0.238 | No  | 1.231 | 0.100 | 0.188 |
| PRKRA          | O75569 | 1.154 | 0.127 | 0.238 | No  | 1.141 | 0.200 | 0.302 |
| CCL15          | Q16663 | 1.226 | 0.127 | 0.238 | No  | 1.313 | 0.079 | 0.159 |
| PD-L1          | Q9NZQ7 | 1.124 | 0.128 | 0.238 | No  | 1.192 | 0.063 | 0.136 |
| RARRES1        | P49788 | 1.066 | 0.128 | 0.238 | Yes | 1.064 | 0.211 | 0.313 |
| PI3            | P19957 | 1.184 | 0.129 | 0.238 | No  | 1.321 | 0.017 | 0.062 |
| TNFRSF14       | Q92956 | 1.145 | 0.132 | 0.238 | No  | 1.290 | 0.011 | 0.049 |
| TIGAR          | Q9NQ88 | 1.141 | 0.132 | 0.238 | No  | 1.146 | 0.336 | 0.441 |
| AXIN1          | O15169 | 1.322 | 0.142 | 0.253 | No  | 0.993 | 0.973 | 0.973 |
| CASP-8         | Q14790 | 1.236 | 0.147 | 0.259 | No  | 1.979 | 0.000 | 0.002 |

|           |        |       |       |       |     |       |       |       |
|-----------|--------|-------|-------|-------|-----|-------|-------|-------|
| IL10      | P22301 | 1.309 | 0.149 | 0.260 | No  | 1.423 | 0.105 | 0.195 |
| TWEAK     | O43508 | 0.892 | 0.154 | 0.265 | Yes | 1.045 | 0.609 | 0.693 |
| LAT2      | Q9GZY6 | 1.245 | 0.159 | 0.271 | No  | 0.874 | 0.437 | 0.516 |
| CD244     | Q9BZW8 | 1.104 | 0.164 | 0.275 | No  | 1.238 | 0.009 | 0.044 |
| PTK7      | Q13308 | 1.136 | 0.174 | 0.286 | No  | 1.248 | 0.056 | 0.129 |
| TNFSF13B  | Q9Y275 | 1.131 | 0.174 | 0.286 | No  | 1.235 | 0.015 | 0.058 |
| CSF-1     | P09603 | 1.082 | 0.176 | 0.286 | No  | 1.146 | 0.047 | 0.112 |
| INPPL1    | O15357 | 1.227 | 0.179 | 0.288 | No  | 1.082 | 0.656 | 0.717 |
| CCL11     | P51671 | 1.125 | 0.181 | 0.288 | No  | 1.207 | 0.080 | 0.159 |
| FOXO1     | Q12778 | 1.149 | 0.194 | 0.305 | No  | 1.105 | 0.415 | 0.503 |
| TOP2B     | Q02880 | 1.155 | 0.199 | 0.310 | No  | 1.297 | 0.026 | 0.078 |
| EGFR      | P00533 | 0.927 | 0.212 | 0.326 | No  | 1.175 | 0.003 | 0.021 |
| TNFRSF10C | O14798 | 0.868 | 0.222 | 0.331 | Yes | 1.126 | 0.310 | 0.420 |
| PLIN1     | O60240 | 1.220 | 0.223 | 0.331 | No  | 1.266 | 0.165 | 0.261 |
| FABP9     | Q0Z7S8 | 1.152 | 0.223 | 0.331 | No  | 1.214 | 0.150 | 0.250 |
| CD163     | Q86VB7 | 1.133 | 0.224 | 0.331 | No  | 1.456 | 0.004 | 0.025 |
| PVALB     | P20472 | 1.432 | 0.226 | 0.331 | No  | 1.178 | 0.615 | 0.697 |
| BANK1     | Q8NDB2 | 1.264 | 0.232 | 0.331 | No  | 1.023 | 0.912 | 0.922 |
| KIM1      | Q96D42 | 1.191 | 0.234 | 0.331 | No  | 1.587 | 0.020 | 0.065 |
| BID       | P55957 | 1.174 | 0.236 | 0.331 | No  | 1.235 | 0.116 | 0.208 |
| CX3CL1    | P78423 | 0.896 | 0.239 | 0.331 | Yes | 1.134 | 0.262 | 0.371 |
| KLK6      | Q92876 | 1.119 | 0.240 | 0.331 | No  | 1.391 | 0.002 | 0.018 |
| SLAMF1    | Q13291 | 1.184 | 0.242 | 0.331 | No  | 1.400 | 0.021 | 0.068 |
| MB        | P02144 | 1.154 | 0.243 | 0.331 | No  | 1.237 | 0.162 | 0.260 |
| FAS       | P25445 | 1.099 | 0.244 | 0.331 | No  | 1.334 | 0.002 | 0.018 |
| TNF-R1    | P19438 | 1.134 | 0.248 | 0.333 | No  | 1.413 | 0.005 | 0.027 |
| CPA1      | P15085 | 1.183 | 0.253 | 0.337 | No  | 1.171 | 0.393 | 0.485 |
| TFPI      | P10646 | 1.105 | 0.259 | 0.342 | Yes | 1.434 | 0.000 | 0.009 |
| CAPG      | P40121 | 1.198 | 0.268 | 0.350 | No  | 1.741 | 0.001 | 0.013 |
| SCF       | P21583 | 0.906 | 0.275 | 0.357 | Yes | 1.168 | 0.191 | 0.296 |
| TR        | P02786 | 0.886 | 0.284 | 0.365 | Yes | 1.225 | 0.083 | 0.161 |
| FOSB      | P53539 | 0.824 | 0.304 | 0.387 | Yes | 1.071 | 0.646 | 0.717 |
| ST2       | Q01638 | 1.099 | 0.310 | 0.391 | No  | 1.595 | 0.000 | 0.003 |
| CNTN1     | Q12860 | 0.917 | 0.314 | 0.393 | No  | 1.244 | 0.011 | 0.050 |
| CA12      | O43570 | 0.923 | 0.324 | 0.403 | Yes | 1.238 | 0.020 | 0.065 |
| GRN       | P28799 | 1.081 | 0.329 | 0.405 | No  | 1.304 | 0.002 | 0.021 |
| HPGDS     | O60760 | 0.933 | 0.333 | 0.407 | No  | 1.145 | 0.096 | 0.182 |
| IL-17C    | Q9P0M4 | 1.181 | 0.341 | 0.409 | No  | 0.809 | 0.341 | 0.445 |
| CD5       | P06127 | 1.071 | 0.342 | 0.409 | No  | 1.169 | 0.079 | 0.159 |
| TFF3      | Q07654 | 1.224 | 0.343 | 0.409 | No  | 1.068 | 0.750 | 0.800 |
| OPN       | P10451 | 1.141 | 0.349 | 0.412 | No  | 1.353 | 0.060 | 0.130 |
| NPPC      | P23582 | 1.186 | 0.353 | 0.414 | No  | 1.185 | 0.456 | 0.535 |
| CXCL1     | P09341 | 1.157 | 0.356 | 0.414 | No  | 0.854 | 0.427 | 0.512 |
| IL-18BP   | O95998 | 1.083 | 0.361 | 0.414 | No  | 1.360 | 0.003 | 0.021 |
| CALR      | P27797 | 1.087 | 0.362 | 0.414 | No  | 0.891 | 0.310 | 0.420 |

|                |         |       |       |       |     |       |       |       |
|----------------|---------|-------|-------|-------|-----|-------|-------|-------|
| CTSZ           | Q9UBR2  | 1.100 | 0.364 | 0.414 | No  | 1.326 | 0.016 | 0.060 |
| IFN-gamma      | P01579  | 1.258 | 0.373 | 0.420 | No  | 1.997 | 0.004 | 0.025 |
| PCSK9          | Q8NBP7  | 1.066 | 0.380 | 0.425 | No  | 1.395 | 0.000 | 0.003 |
| EGFL7          | Q9UHF1  | 1.080 | 0.384 | 0.427 | No  | 1.113 | 0.304 | 0.416 |
| Ep-CAM         | P16422  | 0.828 | 0.396 | 0.437 | No  | 1.728 | 0.018 | 0.064 |
| AMN            | Q9BXJ7  | 1.203 | 0.405 | 0.443 | No  | 1.095 | 0.496 | 0.576 |
| SELE           | P16581  | 1.115 | 0.415 | 0.449 | No  | 1.400 | 0.036 | 0.098 |
| CXCL16         | Q9H2A7  | 1.077 | 0.420 | 0.449 | No  | 1.338 | 0.003 | 0.021 |
| LTBR           | P36941  | 1.079 | 0.422 | 0.449 | No  | 1.194 | 0.121 | 0.211 |
| AP-N           | P15144  | 1.078 | 0.423 | 0.449 | No  | 1.250 | 0.018 | 0.064 |
| ITGB2          | P05107  | 1.057 | 0.434 | 0.454 | No  | 1.255 | 0.007 | 0.038 |
| PLXDC1         | Q8IUUK5 | 0.952 | 0.434 | 0.454 | No  | 1.079 | 0.371 | 0.471 |
| PDGF subunit A | P04085  | 1.089 | 0.437 | 0.454 | No  | 1.070 | 0.625 | 0.704 |
| PLC            | P98160  | 1.071 | 0.440 | 0.454 | No  | 1.221 | 0.040 | 0.104 |
| LIF-R          | P42702  | 1.051 | 0.448 | 0.460 | No  | 1.270 | 0.003 | 0.021 |
| IL-10RB        | Q08334  | 1.064 | 0.459 | 0.463 | No  | 1.339 | 0.001 | 0.017 |
| ADA            | P00813  | 1.070 | 0.460 | 0.463 | No  | 0.985 | 0.879 | 0.900 |
| TNF-R2         | P20333  | 1.079 | 0.467 | 0.463 | No  | 1.290 | 0.036 | 0.098 |
| MCP-4          | Q99616  | 0.918 | 0.470 | 0.463 | No  | 1.116 | 0.398 | 0.489 |
| Gal-4          | P56470  | 1.085 | 0.477 | 0.463 | No  | 1.318 | 0.037 | 0.099 |
| FGR            | P09769  | 1.071 | 0.477 | 0.463 | No  | 0.751 | 0.009 | 0.044 |
| PGF            | P49763  | 1.059 | 0.477 | 0.463 | No  | 1.217 | 0.035 | 0.098 |
| CCL3           | P10147  | 1.127 | 0.478 | 0.463 | No  | 1.457 | 0.008 | 0.040 |
| CDH5           | P33151  | 1.063 | 0.480 | 0.463 | No  | 1.160 | 0.080 | 0.159 |
| GALNT10        | Q86SR1  | 1.043 | 0.492 | 0.472 | No  | 1.202 | 0.014 | 0.057 |
| MCP-2          | P80075  | 1.092 | 0.503 | 0.479 | No  | 1.360 | 0.048 | 0.112 |
| SHPS-1         | P78324  | 1.063 | 0.509 | 0.480 | No  | 1.373 | 0.001 | 0.017 |
| DSG4           | Q86SJ6  | 1.099 | 0.509 | 0.480 | No  | 1.199 | 0.157 | 0.256 |
| TGF-alpha      | P01135  | 1.047 | 0.523 | 0.486 | No  | 1.065 | 0.390 | 0.484 |
| BLM hydrolase  | Q13867  | 1.052 | 0.524 | 0.486 | No  | 1.119 | 0.198 | 0.302 |
| PGLYRP1        | O75594  | 1.078 | 0.526 | 0.486 | No  | 1.323 | 0.032 | 0.092 |
| CLEC1A         | Q8NC01  | 1.064 | 0.540 | 0.493 | No  | 1.279 | 0.029 | 0.086 |
| MPO            | P05164  | 0.947 | 0.546 | 0.493 | No  | 1.148 | 0.131 | 0.226 |
| ENAH           | Q8N8S7  | 1.048 | 0.547 | 0.493 | No  | 1.089 | 0.292 | 0.403 |
| CD6            | P30203  | 1.063 | 0.552 | 0.493 | No  | 1.165 | 0.167 | 0.261 |
| NCF2           | P19878  | 1.111 | 0.554 | 0.493 | No  | 0.930 | 0.713 | 0.764 |
| IGFBP-1        | P08833  | 0.872 | 0.556 | 0.493 | Yes | 2.391 | 0.001 | 0.017 |
| IL-1RT1        | P14778  | 1.047 | 0.557 | 0.493 | No  | 1.307 | 0.001 | 0.017 |
| CNTN2          | Q02246  | 1.056 | 0.561 | 0.493 | No  | 1.313 | 0.008 | 0.041 |
| EN-RAGE        | P80511  | 1.094 | 0.565 | 0.494 | No  | 1.447 | 0.059 | 0.130 |
| MMP-3          | P08254  | 0.935 | 0.573 | 0.498 | No  | 1.381 | 0.019 | 0.065 |
| IL18           | Q14116  | 1.067 | 0.590 | 0.510 | No  | 1.321 | 0.054 | 0.125 |
| ICAM-2         | P13598  | 1.045 | 0.593 | 0.510 | Yes | 1.272 | 0.003 | 0.023 |
| Notch 3        | Q9UM47  | 0.950 | 0.599 | 0.511 | Yes | 1.293 | 0.018 | 0.065 |
| Gal-3          | P17931  | 1.048 | 0.612 | 0.520 | No  | 1.167 | 0.081 | 0.160 |

|              |        |       |       |       |     |       |       |       |
|--------------|--------|-------|-------|-------|-----|-------|-------|-------|
| ALDH3A1      | P30838 | 1.089 | 0.635 | 0.531 | No  | 1.297 | 0.137 | 0.235 |
| CCL28        | Q9NRJ3 | 0.962 | 0.636 | 0.531 | No  | 1.118 | 0.312 | 0.420 |
| IL-1RT2      | P27930 | 0.962 | 0.637 | 0.531 | No  | 1.263 | 0.004 | 0.025 |
| CXCL5        | P42830 | 1.132 | 0.639 | 0.531 | No  | 0.915 | 0.776 | 0.821 |
| MMP-9        | P14780 | 0.931 | 0.646 | 0.534 | No  | 1.142 | 0.421 | 0.507 |
| RETN         | Q9HD89 | 0.959 | 0.651 | 0.535 | Yes | 1.155 | 0.205 | 0.307 |
| TNFSF14      | O43557 | 1.046 | 0.661 | 0.539 | No  | 1.236 | 0.039 | 0.102 |
| CST5         | P28325 | 0.954 | 0.671 | 0.545 | Yes | 1.076 | 0.580 | 0.671 |
| OSM          | P13725 | 0.933 | 0.680 | 0.549 | No  | 1.228 | 0.276 | 0.388 |
| FGF-19       | O95750 | 1.066 | 0.687 | 0.551 | No  | 0.651 | 0.031 | 0.089 |
| MMP-2        | P08253 | 0.966 | 0.689 | 0.551 | Yes | 1.255 | 0.014 | 0.057 |
| IL-18R1      | Q13478 | 1.031 | 0.715 | 0.566 | No  | 1.110 | 0.255 | 0.365 |
| TNNI3        | P19429 | 1.127 | 0.716 | 0.566 | No  | 0.890 | 0.755 | 0.802 |
| IGFBP-2      | P18065 | 1.049 | 0.761 | 0.596 | Yes | 1.547 | 0.016 | 0.060 |
| TMPRSS15     | P98073 | 0.948 | 0.762 | 0.596 | No  | 1.024 | 0.913 | 0.922 |
| PDCD1        | Q15116 | 1.023 | 0.772 | 0.599 | No  | 1.062 | 0.659 | 0.717 |
| COL1A1       | P02452 | 1.027 | 0.777 | 0.599 | No  | 1.266 | 0.027 | 0.080 |
| CCL4         | P13236 | 1.048 | 0.780 | 0.599 | No  | 1.516 | 0.002 | 0.021 |
| PDGFC        | Q9NRA1 | 0.981 | 0.782 | 0.599 | No  | 1.081 | 0.280 | 0.391 |
| CD93         | Q9NPY3 | 1.024 | 0.794 | 0.605 | No  | 1.279 | 0.010 | 0.046 |
| CRH          | P06850 | 0.957 | 0.804 | 0.610 | No  | 0.657 | 0.059 | 0.130 |
| CD8A         | P01732 | 1.032 | 0.832 | 0.625 | No  | 1.138 | 0.481 | 0.562 |
| CALCA        | P01258 | 0.961 | 0.833 | 0.625 | No  | 1.222 | 0.367 | 0.470 |
| EPHB4        | P54760 | 1.016 | 0.840 | 0.627 | Yes | 1.256 | 0.010 | 0.047 |
| CCL23        | P55773 | 1.018 | 0.863 | 0.634 | No  | 1.153 | 0.218 | 0.319 |
| AGR2         | O95994 | 0.971 | 0.865 | 0.634 | No  | 1.268 | 0.207 | 0.309 |
| ST3GAL1      | Q11201 | 1.017 | 0.866 | 0.634 | No  | 1.136 | 0.282 | 0.391 |
| TRAIL        | P50591 | 0.989 | 0.870 | 0.634 | No  | 0.989 | 0.874 | 0.898 |
| TNFB         | P01374 | 1.016 | 0.871 | 0.634 | No  | 1.046 | 0.688 | 0.742 |
| OPG          | O00300 | 1.013 | 0.878 | 0.634 | No  | 1.267 | 0.020 | 0.065 |
| DLK-1        | P80370 | 1.023 | 0.880 | 0.634 | No  | 1.497 | 0.026 | 0.078 |
| AZU1         | P20160 | 0.978 | 0.885 | 0.635 | No  | 1.247 | 0.155 | 0.254 |
| ALCAM        | Q13740 | 1.011 | 0.891 | 0.635 | No  | 1.284 | 0.001 | 0.017 |
| TIMP4        | Q99727 | 0.989 | 0.896 | 0.635 | No  | 0.962 | 0.680 | 0.736 |
| TR-AP        | P13686 | 0.988 | 0.901 | 0.635 | No  | 1.177 | 0.088 | 0.170 |
| IL-17RA      | Q96F46 | 0.987 | 0.903 | 0.635 | No  | 1.272 | 0.041 | 0.106 |
| NBN          | O60934 | 0.985 | 0.907 | 0.635 | No  | 1.113 | 0.384 | 0.481 |
| AXL          | P30530 | 1.008 | 0.921 | 0.642 | No  | 1.226 | 0.035 | 0.098 |
| LDL receptor | P01130 | 1.013 | 0.932 | 0.647 | No  | 1.438 | 0.039 | 0.102 |
| PRTN3        | P24158 | 1.007 | 0.948 | 0.655 | No  | 1.225 | 0.047 | 0.112 |
| MMP-10       | P09238 | 0.994 | 0.964 | 0.661 | No  | 1.258 | 0.120 | 0.211 |
| CHI3L1       | P36222 | 0.994 | 0.966 | 0.661 | Yes | 1.468 | 0.031 | 0.089 |
| ENTPD6       | O75354 | 1.003 | 0.970 | 0.661 | No  | 1.112 | 0.147 | 0.248 |
| IL7          | P13232 | 0.996 | 0.978 | 0.663 | No  | 1.019 | 0.862 | 0.894 |
| TLT-2        | Q5T2D2 | 1.001 | 0.990 | 0.664 | No  | 1.211 | 0.045 | 0.112 |

|        |        |       |       |       |    |       |       |       |
|--------|--------|-------|-------|-------|----|-------|-------|-------|
| RASSF2 | P50749 | 1.001 | 0.992 | 0.664 | No | 1.007 | 0.954 | 0.958 |
| DPP6   | P42658 | 1.000 | 0.998 | 0.664 | No | 1.213 | 0.046 | 0.112 |
| OPG    | O00300 | 1.000 | 0.998 | 0.664 | No | 1.312 | 0.008 | 0.040 |



**Table S3. Sensitivity analyses comparing plasma protein expression of ACMP cases with controls.**

| <b>Protein</b> | <b>Adjusted for NT-proBNP<sup>1</sup></b> |                | <b>Analysis in 20 ACMP cases without heart failure<sup>2</sup></b> |                |
|----------------|-------------------------------------------|----------------|--------------------------------------------------------------------|----------------|
|                | <b>Fold change</b>                        | <b>p-value</b> | <b>Fold change</b>                                                 | <b>p-value</b> |
| NT-proBNP      | -                                         | -              | 1.24                                                               | 0.231          |
| CCL19          | 1.45                                      | 0.010          | 1.61                                                               | 0.002          |
| CCL20          | 1.72                                      | 0.037          | 1.64                                                               | 0.025          |
| PSPD           | 1.52                                      | 0.012          | 1.88                                                               | <0.001         |
| PTN            | 1.30                                      | 0.047          | 1.35                                                               | 0.033          |

1: Linear regression model adjusted for sex, time since cancer diagnosis, anthracycline dose, chest-directed radiotherapy dose and NT-proBNP. 2: Linear regression in 20 asymptomatic cases compared to their matched controls, adjusted for sex, time since cancer diagnosis, anthracycline dose, chest-directed radiotherapy dose. CCL19=C-C motif chemokine ligand 19, CCL20=C-C motif chemokine ligand 20, NT-proBNP=N-terminal pro-B-type natriuretic peptide, PSPD=Pulmonary surfactant protein D, PTN=Pleiotrophin.
